# Supplementary material for: BPGA- an ultra-fast pan-genome analysis pipeline
Source: PubMed Central journal article supplement (PMC4829868; doi:10.1038/srep24373), 2016-04-13
Supplement: srep24373-s1.pdf [file srep24373-s1.pdf]

# **BPGA - an ultra-fast pan-genome analysis pipeline**

Narendrakumar M. Chaudhari<sup>1,+</sup>, Vinod Kumar Gupta<sup>1,+</sup> and Chitra Dutta<sup>1,\*</sup>

<sup>1</sup>Structural Biology & Bioinformatics Division, CSIR- Indian Institute of Chemical Biology, 4,  
Raja S. C. Mullick Road, Kolkata 700032, India.

\*Corresponding Author, C.D. ([cdutta@iicb.res.in](mailto:cdutta@iicb.res.in)).

<sup>+</sup>These authors contributed equally to this work.

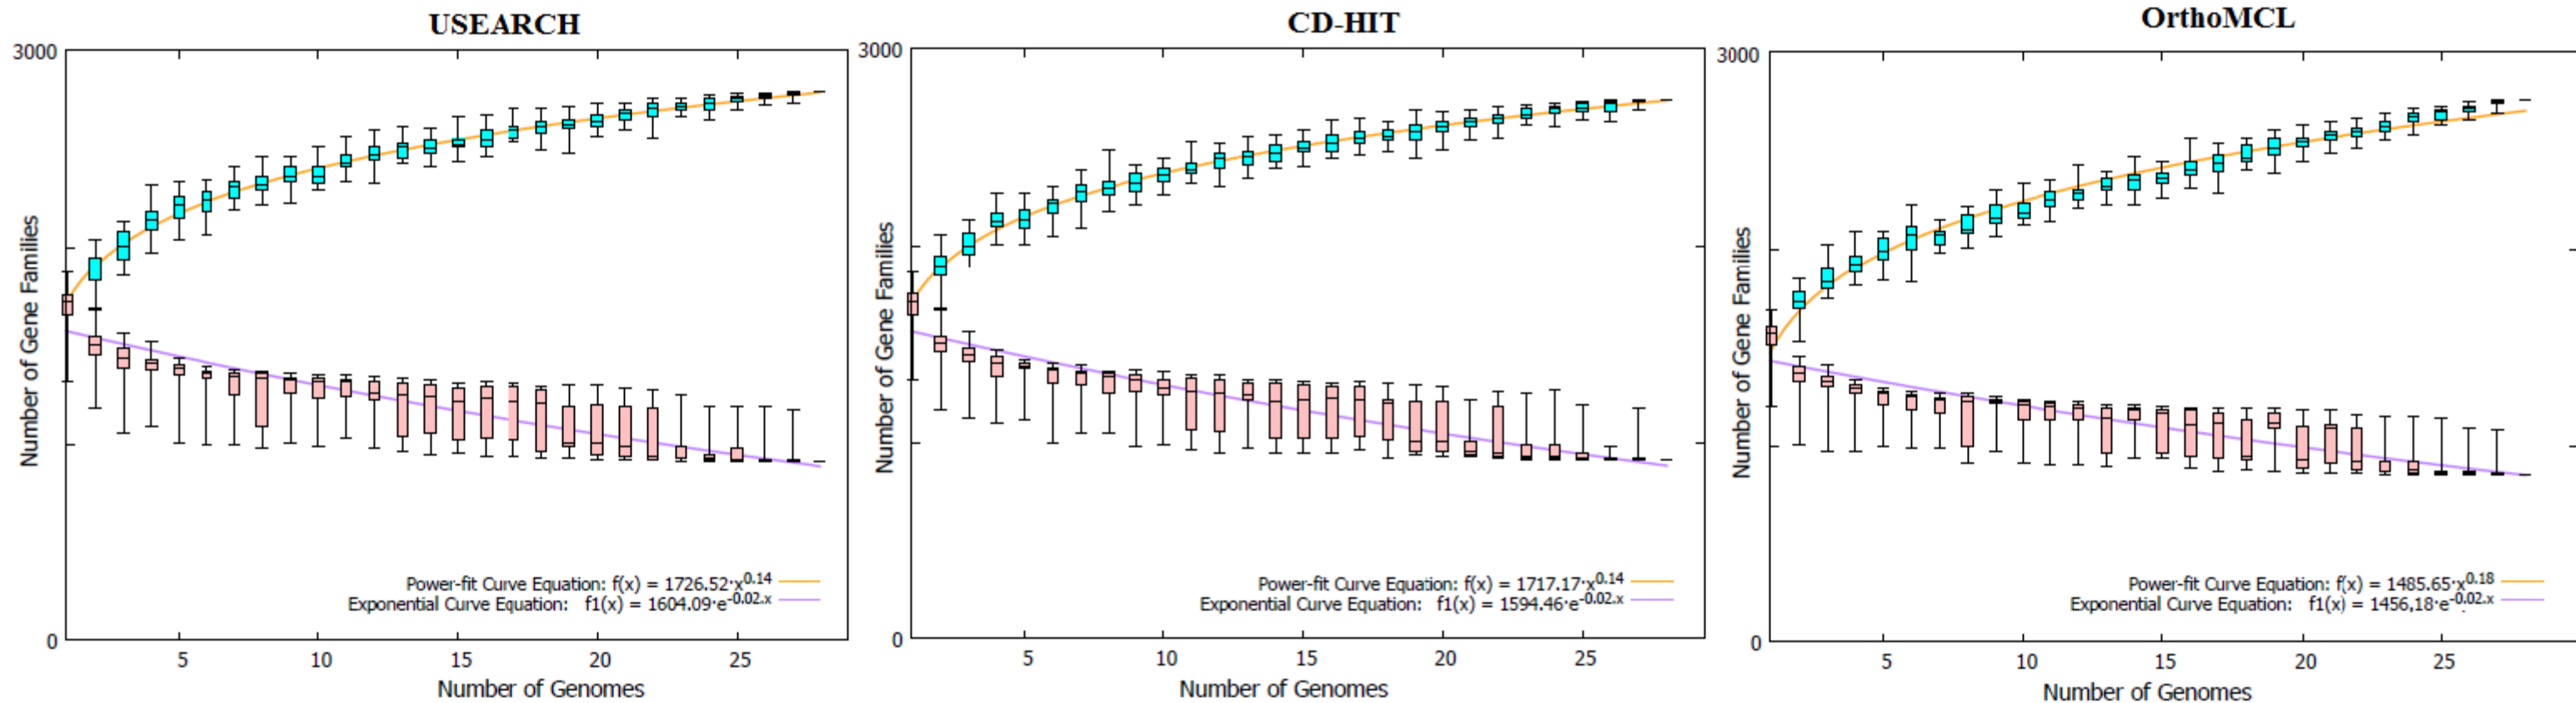

**Supplementary Figure S1:** Pan-genome profile curves for 28 strains of *Streptococcus pyogenes*.

CD-HIT

OrthoMCL

Core phylogeny

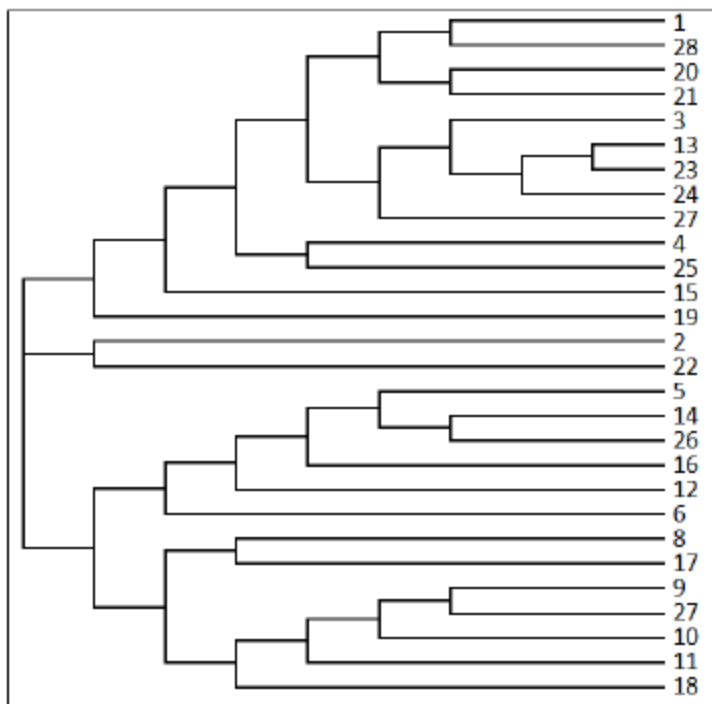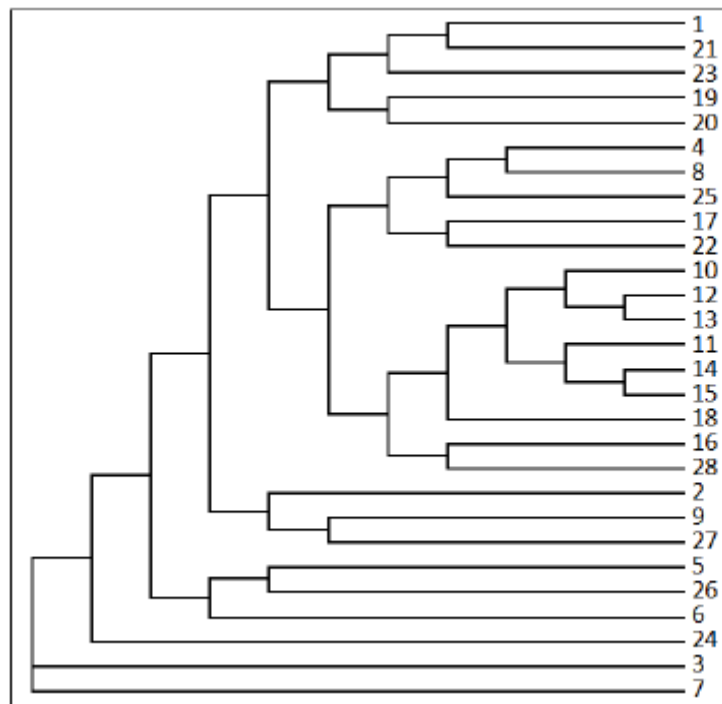

Pan phylogeny

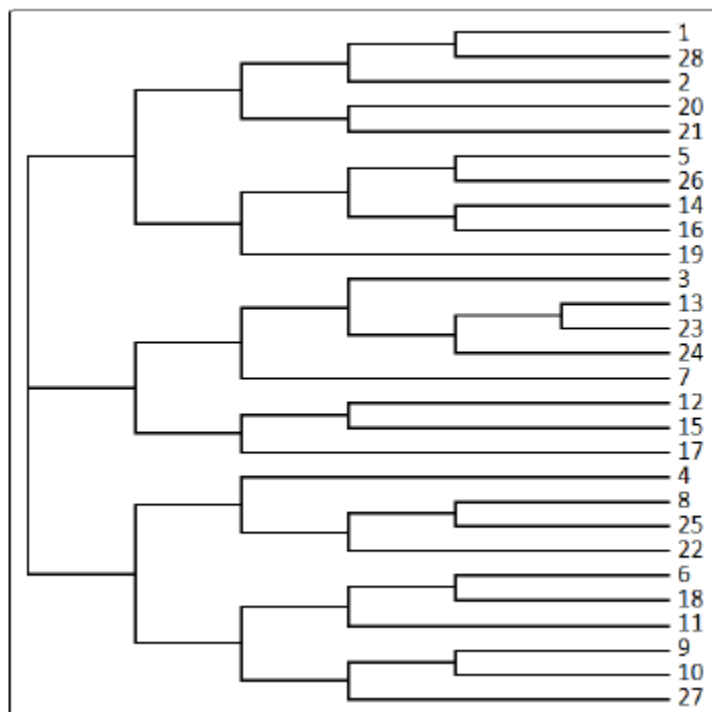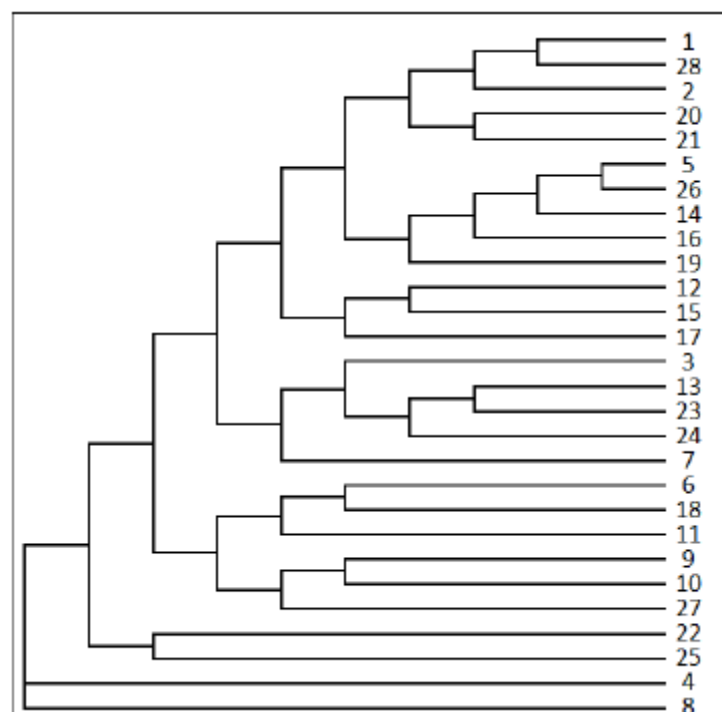

**Supplementary Figure S2:** Phylogenetic trees based on core & pan genome for 28 strains of *Streptococcus pyogenes*.

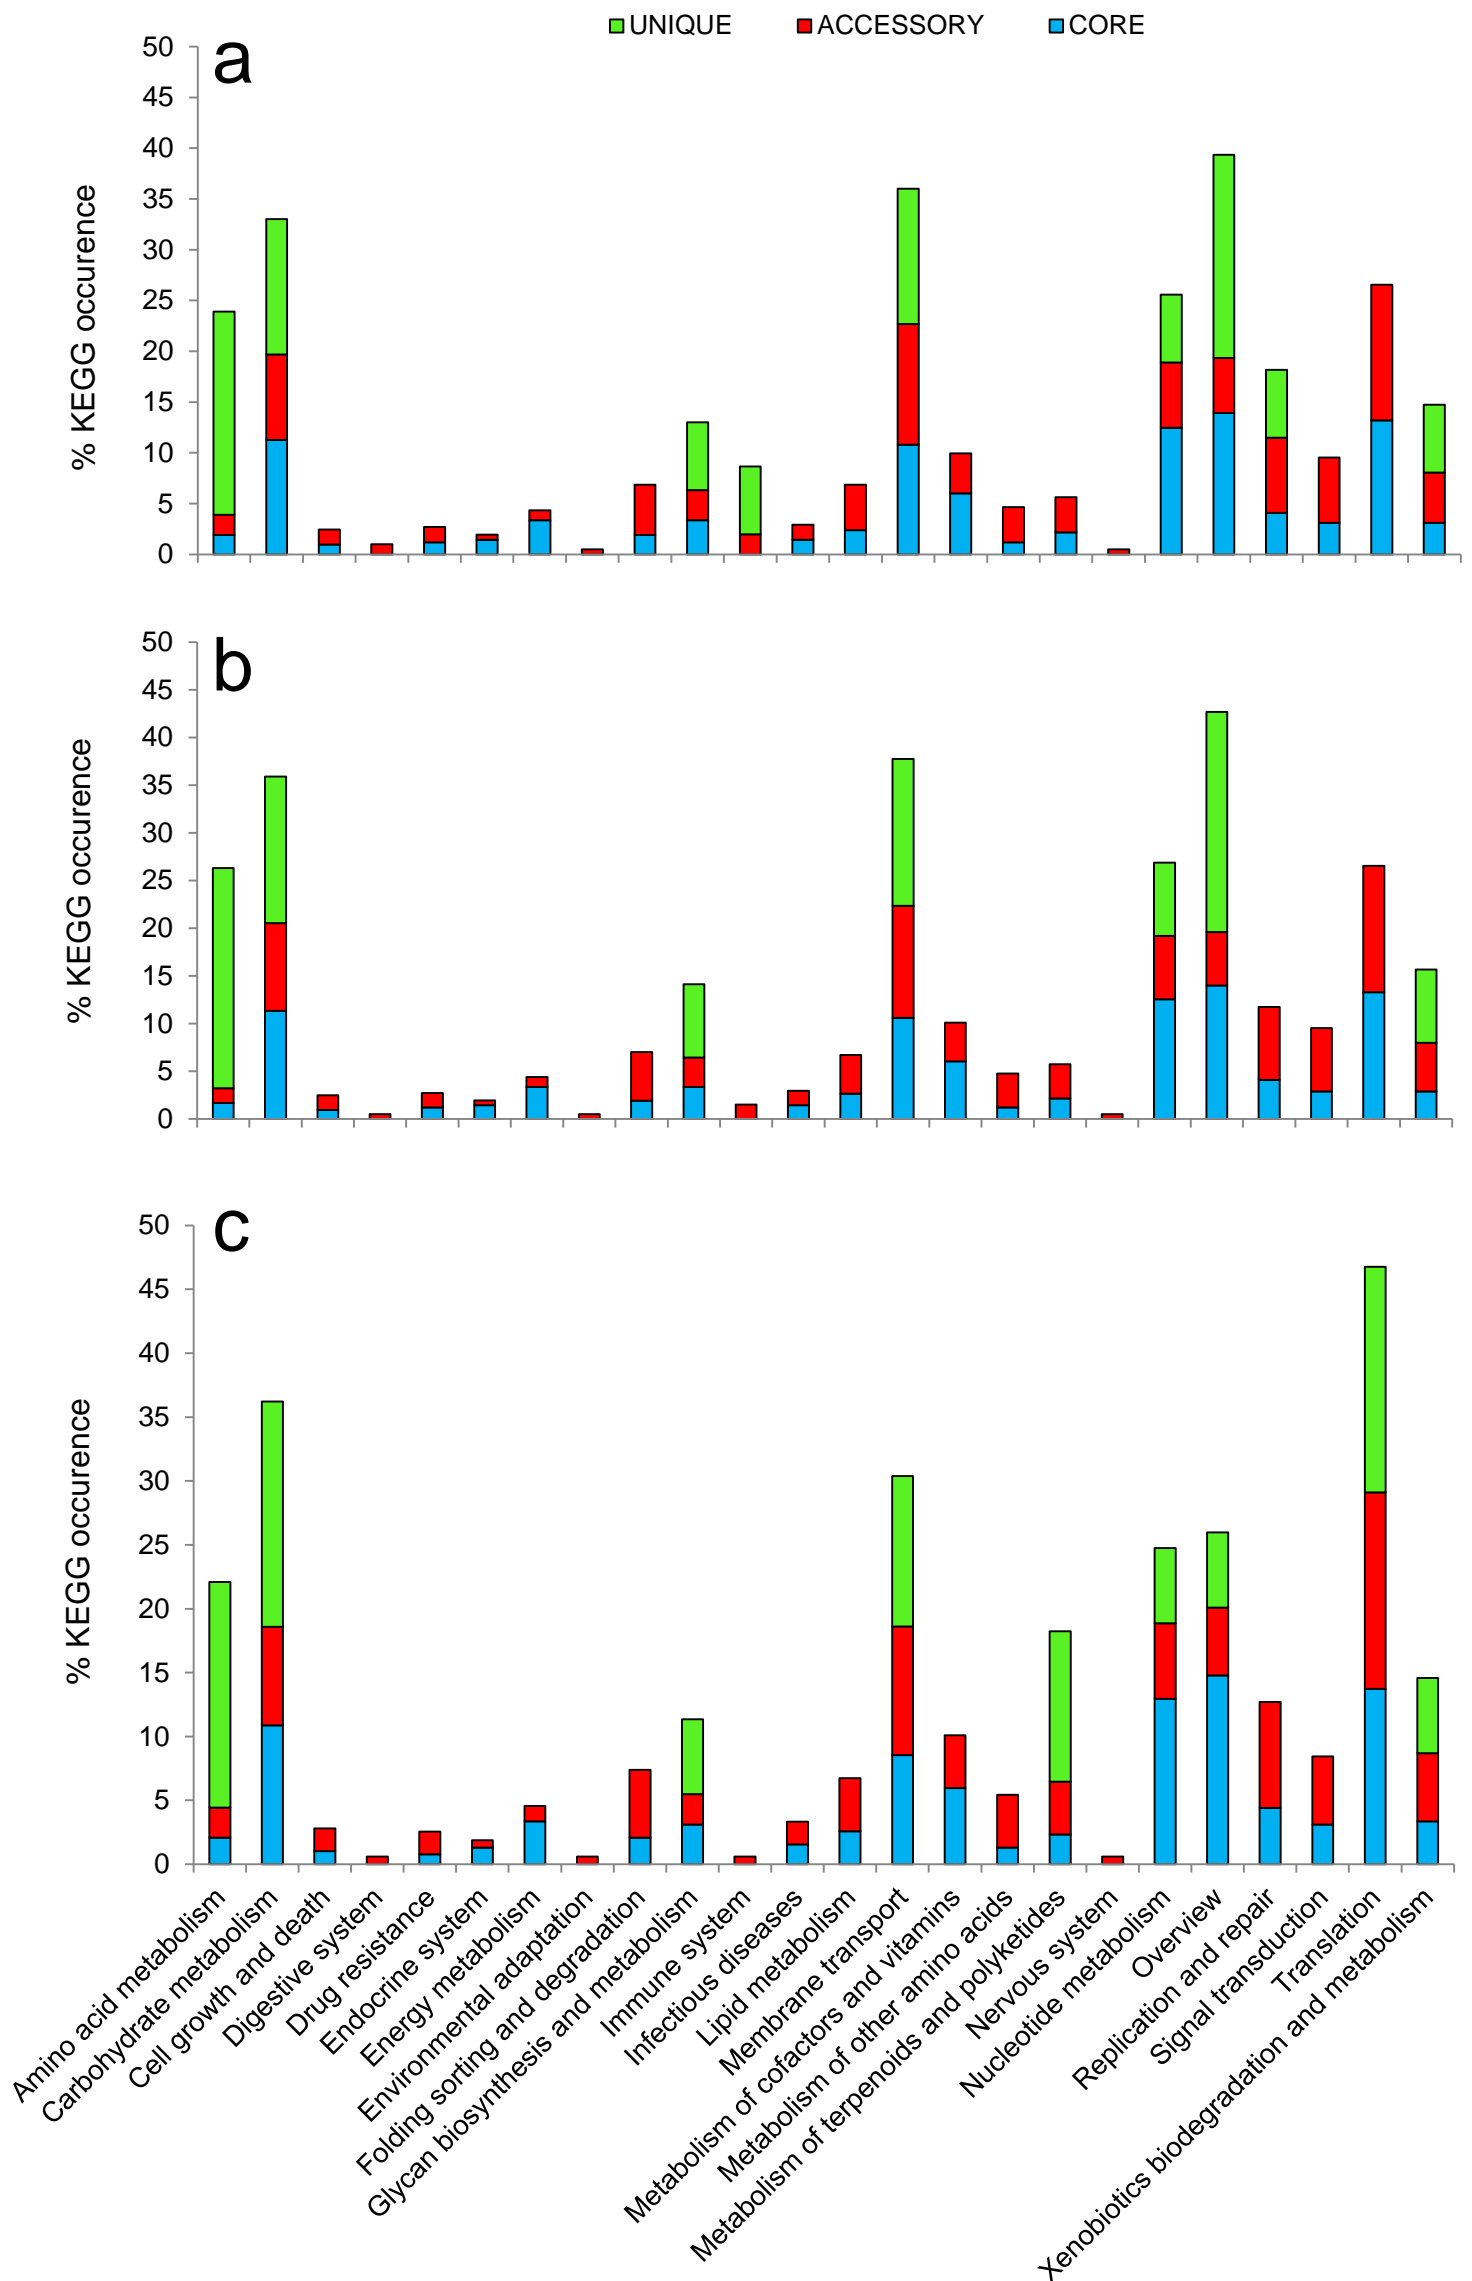

**Supplementary Figure S3:** KEGG pathway distribution of *S. pyogenes* pan genome from (a) USEARCH, (b) CD-HIT and (c) OrthoMCL.

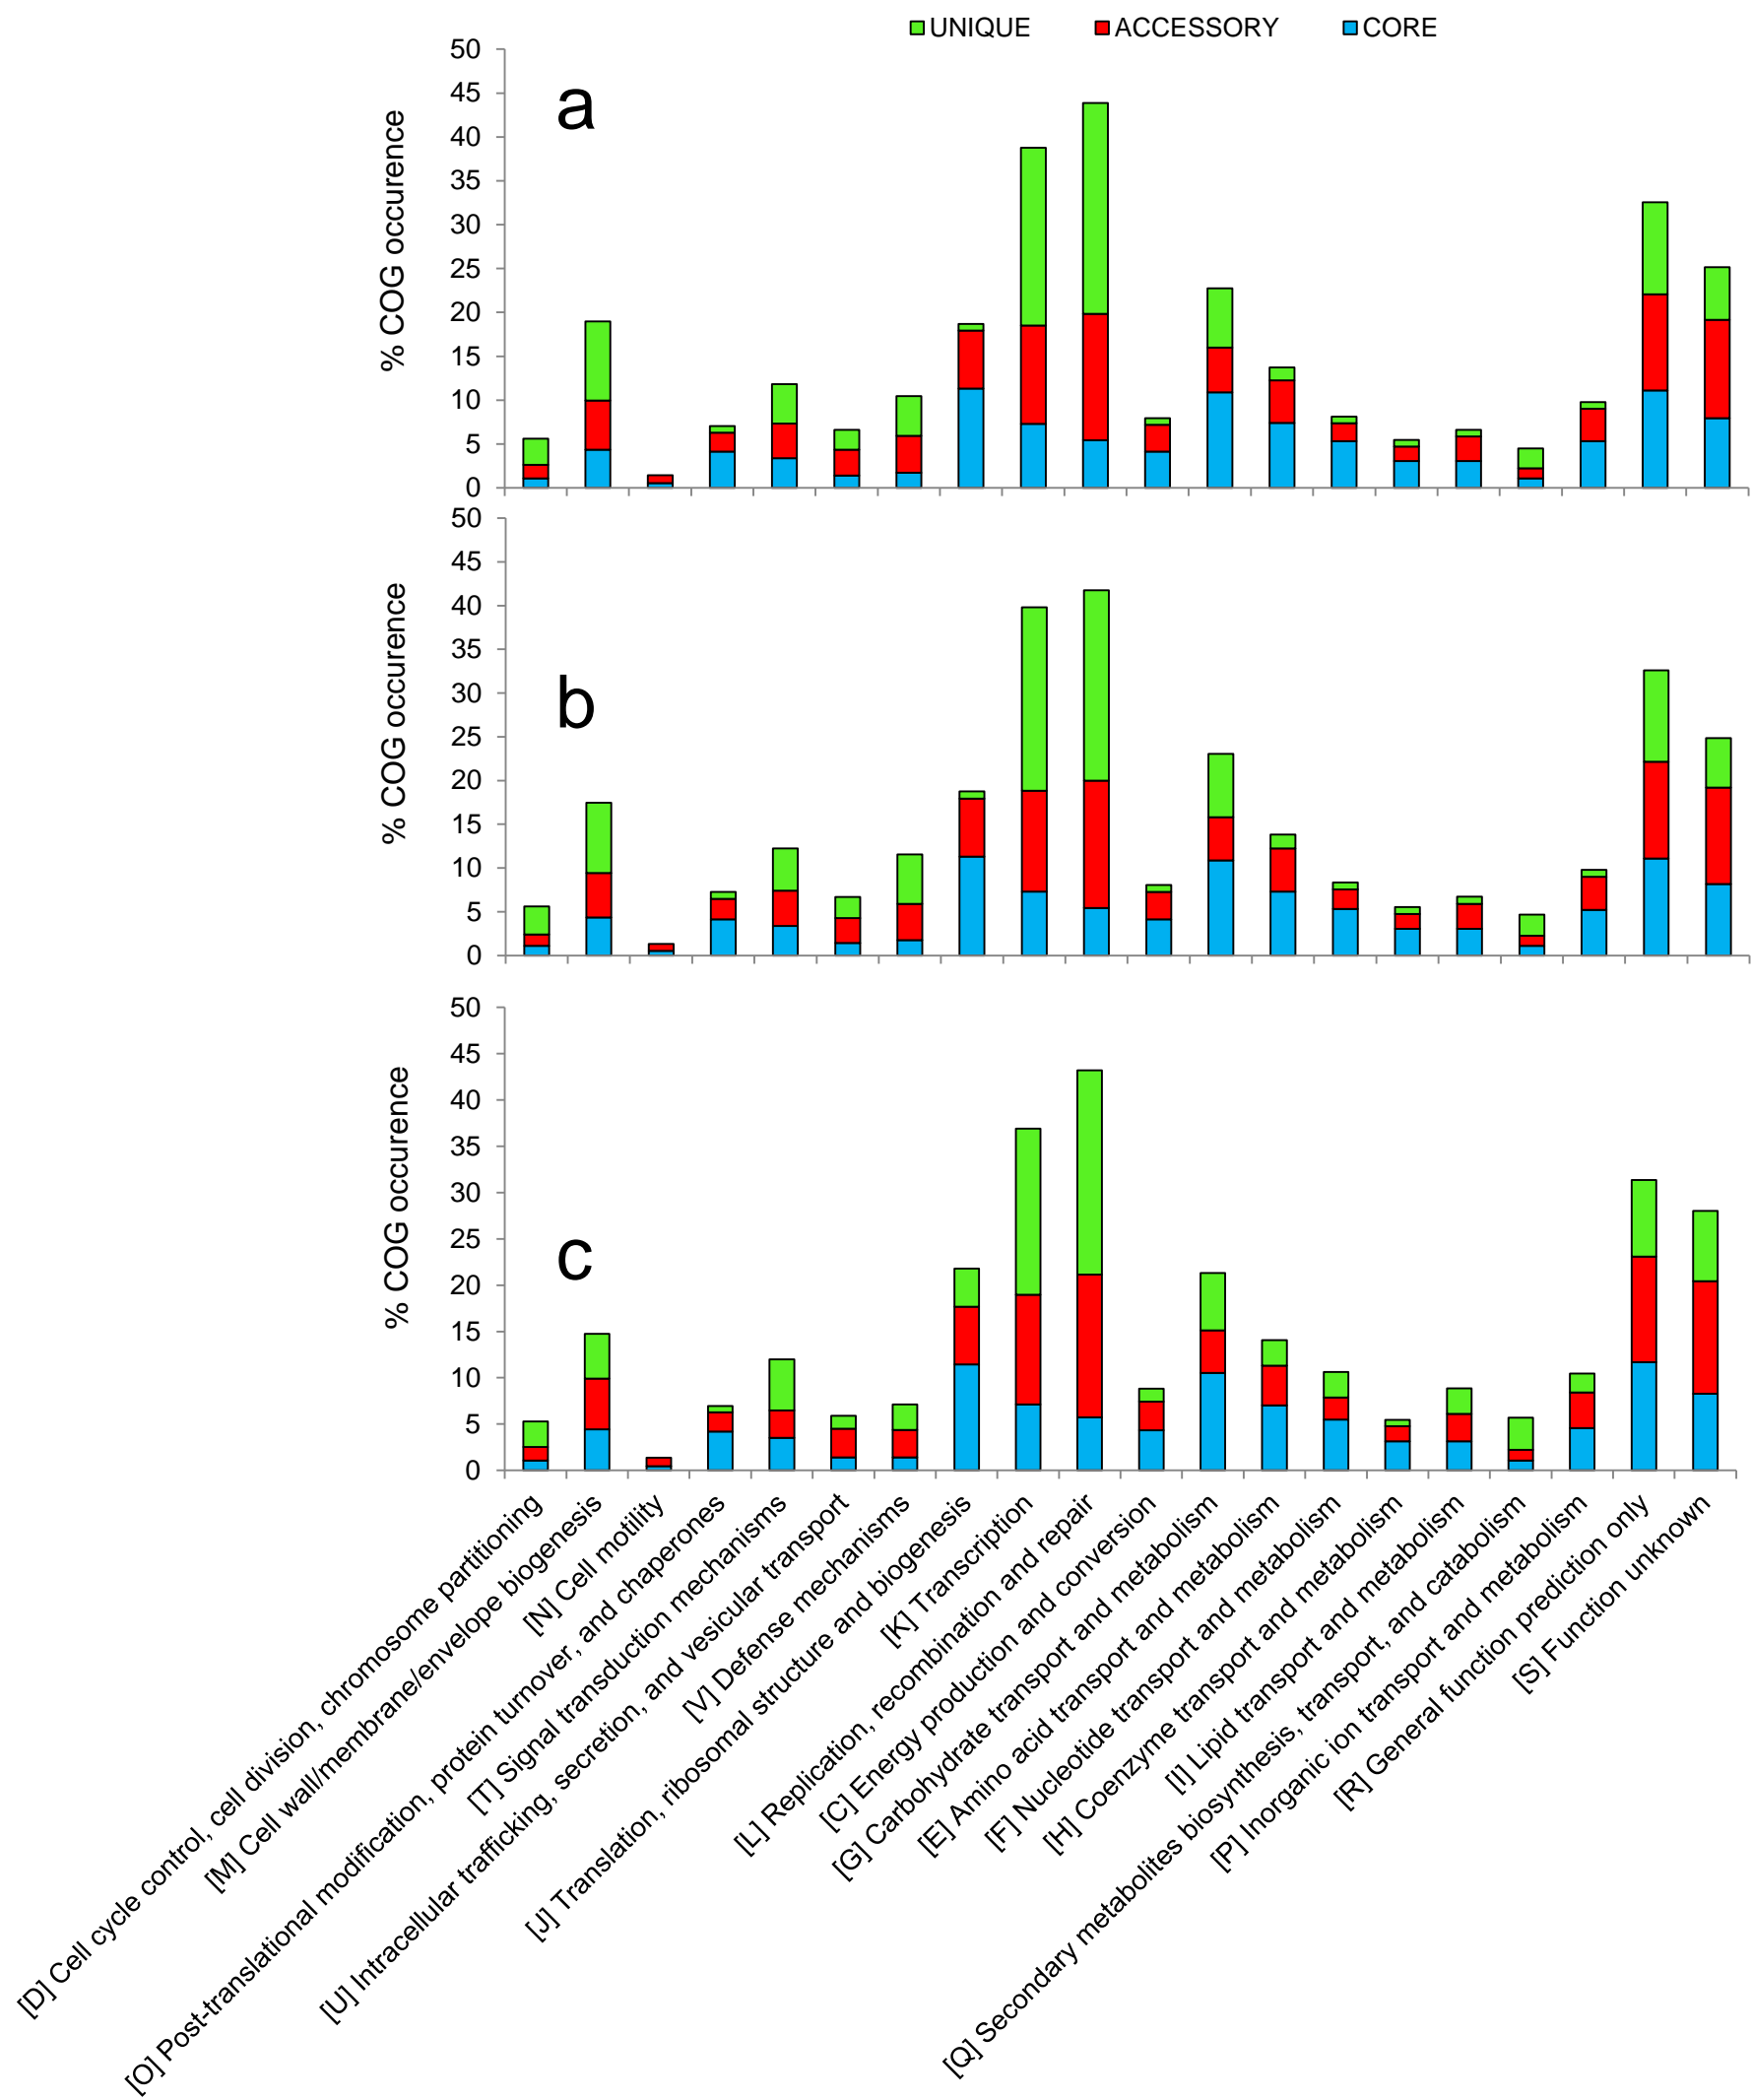

**Supplementary Figure S4:** COG distribution of *S. pyogenes* pan genome from (a) USEARCH, (b) CD-HIT and (c) OrthoMCL.

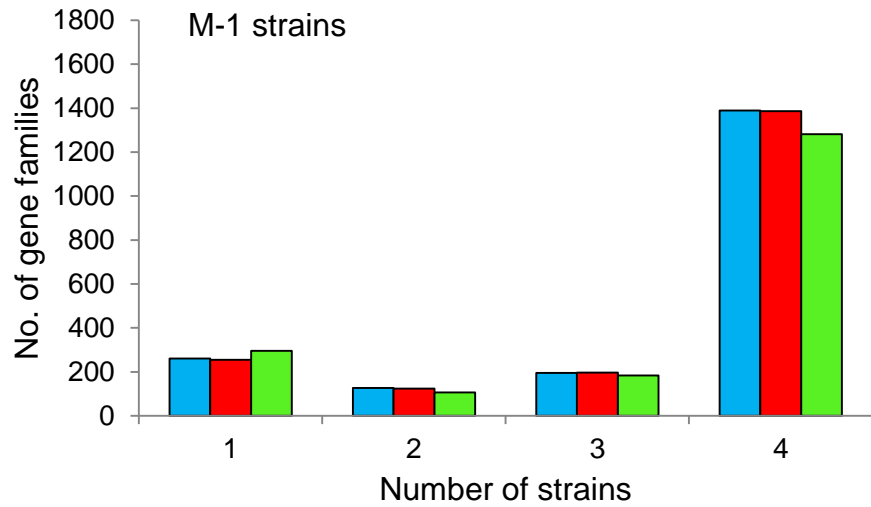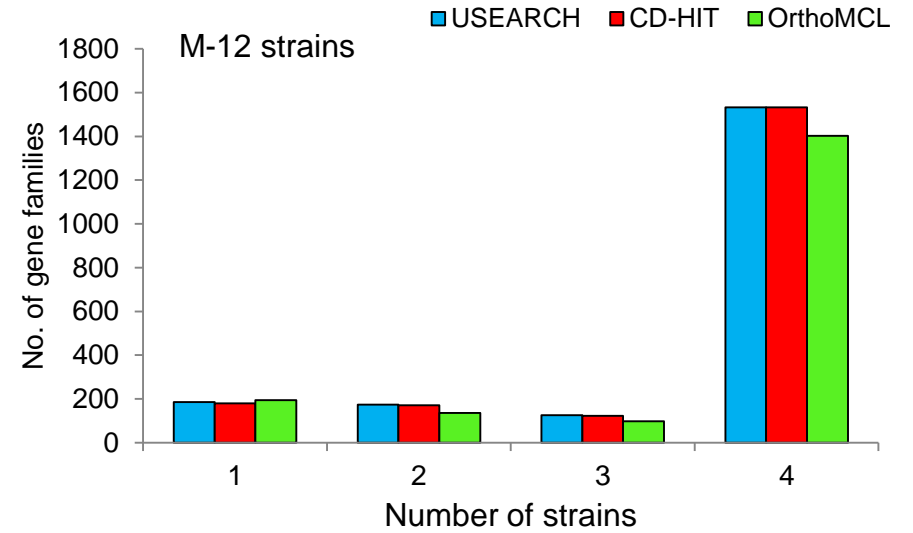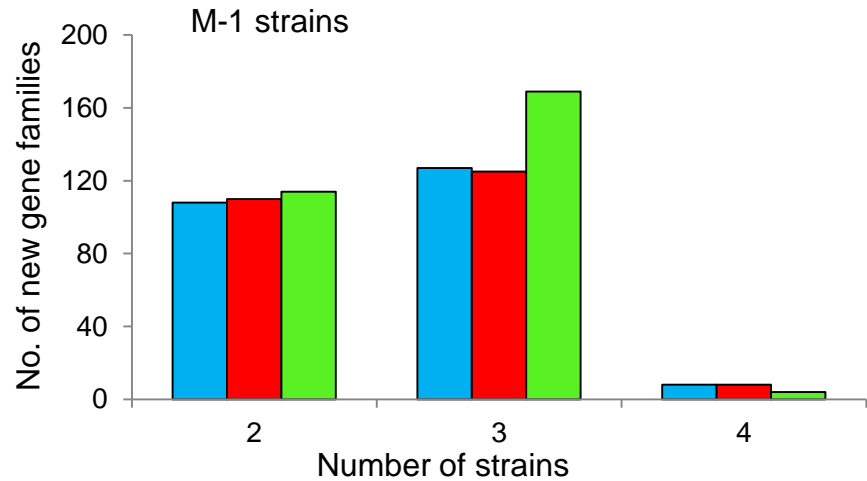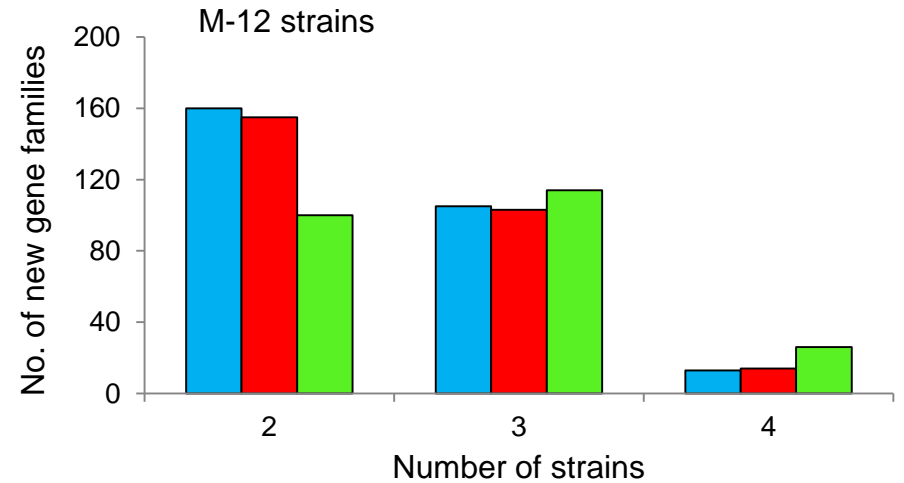

**Supplementary Figure S5:** Comparison of gene family distribution among strains (upper panel) and addition of new genes into pan-genome (lower panel); between two groups: M-1 strains and M-12 strains of *Streptococcus pyogenes* species.

**Table S1a:** Test dataset.

| Sr. No. | Organism name                                   | No. of proteins | Genomic G+C (%) | No. of Atypical Genes |
|---------|-------------------------------------------------|-----------------|-----------------|-----------------------|
| 1       | <i>Streptococcus pyogenes 1E1</i>               | 1652            | 38.6            | 85                    |
| 2       | <i>Streptococcus pyogenes strain 7F7</i>        | 1550            | 38.8            | 92                    |
| 3       | <i>Streptococcus pyogenes strain API</i>        | 1836            | 38.6            | 122                   |
| 4       | <i>Streptococcus pyogenes strain ATCC 19615</i> | 1775            | 38.5            | 171                   |
| 5       | <i>Streptococcus pyogenes strain HKU360</i>     | 1846            | 38.4            | 72                    |
| 6       | <i>Streptococcus pyogenes M23ND</i>             | 1842            | 38.6            | 95                    |
| 7       | <i>Streptococcus pyogenes M1 GAS</i>            | 1696            | 38.6            | 130                   |
| 8       | <i>Streptococcus pyogenes MGAS8232</i>          | 1839            | 38.5            | 121                   |
| 9       | <i>Streptococcus pyogenes MGAS315</i>           | 1865            | 38.6            | 187                   |
| 10      | <i>Streptococcus pyogenes SSI-1</i>             | 1859            | 38.5            | 150                   |
| 11      | <i>Streptococcus pyogenes MGAS10394</i>         | 1886            | 38.6            | 168                   |
| 12      | <i>Streptococcus pyogenes MGAS6180</i>          | 1894            | 38.3            | 128                   |
| 13      | <i>Streptococcus pyogenes MGAS5005</i>          | 1865            | 38.5            | 165                   |
| 14      | <i>Streptococcus pyogenes MGAS9429</i>          | 1877            | 38.3            | 102                   |
| 15      | <i>Streptococcus pyogenes MGAS10270</i>         | 1987            | 38.3            | 92                    |
| 16      | <i>Streptococcus pyogenes MGAS2096</i>          | 1898            | 38.6            | 121                   |
| 17      | <i>Streptococcus pyogenes MGAS10750</i>         | 1978            | 38.3            | 128                   |
| 18      | <i>Streptococcus pyogenes str. Manfredo</i>     | 1745            | 38.7            | 134                   |
| 19      | <i>Streptococcus pyogenes NZ131</i>             | 1700            | 38.6            | 134                   |
| 20      | <i>Streptococcus pyogenes MGAS15252</i>         | 1662            | 38.6            | 69                    |
| 21      | <i>Streptococcus pyogenes MGAS1882</i>          | 1691            | 38.6            | 72                    |
| 22      | <i>Streptococcus pyogenes Alab49</i>            | 1773            | 38.6            | 148                   |
| 23      | <i>Streptococcus pyogenes A20</i>               | 1828            | 38.5            | 169                   |
| 24      | <i>Streptococcus pyogenes M1 476</i>            | 1571            | 38.7            | 141                   |
| 25      | <i>Streptococcus pyogenes HSC5</i>              | 1744            | 38.5            | 183                   |
| 26      | <i>Streptococcus pyogenes HKU QMH11M0907901</i> | 1865            | 38.4            | 122                   |
| 27      | <i>Streptococcus pyogenes STAB902</i>           | 1809            | 38.6            | 124                   |
| 28      | <i>Streptococcus pyogenes STAB901</i>           | 1358            | 38.7            | 73                    |

M-1 Strains, M-12 Strains.

**Table S1b:** Additional Test Dataset - Distribution of core, accessory, unique and exclusively absent genes among 11 *S. pyogenes* strains

| Sr. No. | Organism name                           | No. of core genes | No. of accessory genes | No. of unique genes | No. of exclusively absent genes |
|---------|-----------------------------------------|-------------------|------------------------|---------------------|---------------------------------|
| 1       | <i>Streptococcus pyogenes</i> MI GAS    | 1359              | 274                    | 7                   | 27                              |
| 2       | <i>Streptococcus pyogenes</i> MGAS8232  | 1359              | 353                    | 23                  | 8                               |
| 3       | <i>Streptococcus pyogenes</i> MGAS315   | 1359              | 384                    | 6                   | 4                               |
| 4       | <i>Streptococcus pyogenes</i> SSI 1     | 1359              | 379                    | 18                  | 6                               |
| 5       | <i>Streptococcus pyogenes</i> MGAS10394 | 1359              | 361                    | 65                  | 10                              |
| 6       | <i>Streptococcus pyogenes</i> MGAS6180  | 1359              | 446                    | 19                  | 0                               |
| 7       | <i>Streptococcus pyogenes</i> MGAS5005  | 1359              | 405                    | 7                   | 3                               |
| 8       | <i>Streptococcus pyogenes</i> MGAS9429  | 1359              | 400                    | 30                  | 1                               |
| 9       | <i>Streptococcus pyogenes</i> MGAS10270 | 1359              | 469                    | 42                  | 1                               |
| 10      | <i>Streptococcus pyogenes</i> MGAS2096  | 1359              | 339                    | 59                  | 7                               |
| 11      | <i>Streptococcus pyogenes</i> MGAS10750 | 1359              | 428                    | 72                  | 3                               |



**Table S2:** Distribution of core, accessory, unique and exclusively absent genes among all 28 *S. pyogenes* strains using USEARCH clustering tool.

| Genome id | Organism name                                   | No. of core genes | No. of accessory genes | No. of unique genes | No. of exclusively absent genes |
|-----------|-------------------------------------------------|-------------------|------------------------|---------------------|---------------------------------|
| 1         | <i>Streptococcus pyogenes</i> 1E1               | 913               | 697                    | 5                   | 2                               |
| 2         | <i>Streptococcus pyogenes</i> strain 7F7        | 913               | 601                    | 2                   | 1                               |
| 3         | <i>Streptococcus pyogenes</i> strain AP1        | 913               | 804                    | 12                  | 3                               |
| 4         | <i>Streptococcus pyogenes</i> strain ATCC 19615 | 913               | 765                    | 8                   | 1                               |
| 5         | <i>Streptococcus pyogenes</i> strain HKU360     | 913               | 821                    | 5                   | 2                               |
| 6         | <i>Streptococcus pyogenes</i> M23ND             | 913               | 779                    | 21                  | 2                               |
| 7         | <i>Streptococcus pyogenes</i> M1 GAS            | 913               | 722                    | 1                   | 13                              |
| 8         | <i>Streptococcus pyogenes</i> MGAS8232          | 913               | 805                    | 13                  | 2                               |
| 9         | <i>Streptococcus pyogenes</i> MGAS315           | 913               | 834                    | 1                   | 0                               |
| 10        | <i>Streptococcus pyogenes</i> SSI 1             | 913               | 828                    | 13                  | 3                               |
| 11        | <i>Streptococcus pyogenes</i> MGAS10394         | 913               | 814                    | 55                  | 6                               |
| 12        | <i>Streptococcus pyogenes</i> MGAS6180          | 913               | 894                    | 14                  | 0                               |
| 13        | <i>Streptococcus pyogenes</i> MGAS5005          | 913               | 850                    | 2                   | 0                               |
| 14        | <i>Streptococcus pyogenes</i> MGAS9429          | 913               | 853                    | 22                  | 0                               |
| 15        | <i>Streptococcus pyogenes</i> MGAS10270         | 913               | 922                    | 35                  | 0                               |
| 16        | <i>Streptococcus pyogenes</i> MGAS2096          | 913               | 788                    | 56                  | 3                               |
| 17        | <i>Streptococcus pyogenes</i> MGAS10750         | 913               | 900                    | 45                  | 1                               |
| 18        | <i>Streptococcus pyogenes</i> str. Manfredo     | 913               | 751                    | 8                   | 10                              |
| 19        | <i>Streptococcus pyogenes</i> NZ131             | 913               | 721                    | 21                  | 4                               |
| 20        | <i>Streptococcus pyogenes</i> MGAS15252         | 913               | 701                    | 1                   | 1                               |
| 21        | <i>Streptococcus pyogenes</i> MGAS1882          | 913               | 739                    | 3                   | 1                               |
| 22        | <i>Streptococcus pyogenes</i> Alab49            | 913               | 775                    | 5                   | 4                               |
| 23        | <i>Streptococcus pyogenes</i> A20               | 913               | 841                    | 8                   | 0                               |
| 24        | <i>Streptococcus pyogenes</i> M1 476            | 913               | 609                    | 4                   | 65                              |
| 25        | <i>Streptococcus pyogenes</i> HSC5              | 913               | 729                    | 10                  | 16                              |
| 26        | <i>Streptococcus pyogenes</i> HKU QMH11M0907901 | 913               | 836                    | 7                   | 0                               |
| 27        | <i>Streptococcus pyogenes</i> STAB902           | 913               | 797                    | 0                   | 2                               |
| 28        | <i>Streptococcus pyogenes</i> STAB901           | 913               | 391                    | 11                  | 257                             |

**Table S3:** Distribution of core, accessory, unique and exclusively absent genes among all 28 *S. pyogenes* strains using CD-HIT clustering tool.

| Genome id | Organism name                                   | No. of core genes | No. of accessory genes | No. of unique genes | No. of exclusively absent genes |
|-----------|-------------------------------------------------|-------------------|------------------------|---------------------|---------------------------------|
| 1         | <i>Streptococcus pyogenes 1E1</i>               | 914               | 696                    | 3                   | 2                               |
| 2         | <i>Streptococcus pyogenes strain 7F7</i>        | 914               | 596                    | 3                   | 1                               |
| 3         | <i>Streptococcus pyogenes strain AP1</i>        | 914               | 792                    | 13                  | 3                               |
| 4         | <i>Streptococcus pyogenes strain ATCC 19615</i> | 914               | 759                    | 8                   | 1                               |
| 5         | <i>Streptococcus pyogenes strain HKU360</i>     | 914               | 813                    | 4                   | 2                               |
| 6         | <i>Streptococcus pyogenes M23ND</i>             | 914               | 773                    | 19                  | 2                               |
| 7         | <i>Streptococcus pyogenes M1 GAS</i>            | 914               | 717                    | 1                   | 13                              |
| 8         | <i>Streptococcus pyogenes MGAS8232</i>          | 914               | 797                    | 12                  | 2                               |
| 9         | <i>Streptococcus pyogenes MGAS315</i>           | 914               | 825                    | 1                   | 0                               |
| 10        | <i>Streptococcus pyogenes SSI 1</i>             | 914               | 817                    | 11                  | 3                               |
| 11        | <i>Streptococcus pyogenes MGAS10394</i>         | 914               | 807                    | 54                  | 6                               |
| 12        | <i>Streptococcus pyogenes MGAS6180</i>          | 914               | 894                    | 11                  | 0                               |
| 13        | <i>Streptococcus pyogenes MGAS5005</i>          | 914               | 845                    | 2                   | 0                               |
| 14        | <i>Streptococcus pyogenes MGAS9429</i>          | 914               | 849                    | 18                  | 0                               |
| 15        | <i>Streptococcus pyogenes MGAS10270</i>         | 914               | 916                    | 32                  | 0                               |
| 16        | <i>Streptococcus pyogenes MGAS2096</i>          | 914               | 781                    | 56                  | 3                               |
| 17        | <i>Streptococcus pyogenes MGAS10750</i>         | 914               | 890                    | 43                  | 1                               |
| 18        | <i>Streptococcus pyogenes str. Manfredo</i>     | 914               | 742                    | 7                   | 10                              |
| 19        | <i>Streptococcus pyogenes NZ131</i>             | 914               | 723                    | 17                  | 4                               |
| 20        | <i>Streptococcus pyogenes MGAS15252</i>         | 914               | 696                    | 1                   | 2                               |
| 21        | <i>Streptococcus pyogenes MGAS1882</i>          | 914               | 733                    | 3                   | 1                               |
| 22        | <i>Streptococcus pyogenes Alab49</i>            | 914               | 767                    | 4                   | 4                               |
| 23        | <i>Streptococcus pyogenes A20</i>               | 914               | 834                    | 8                   | 0                               |
| 24        | <i>Streptococcus pyogenes M1 476</i>            | 914               | 608                    | 4                   | 64                              |
| 25        | <i>Streptococcus pyogenes HSC5</i>              | 914               | 723                    | 9                   | 16                              |
| 26        | <i>Streptococcus pyogenes HKU QMH11M0907901</i> | 914               | 828                    | 8                   | 0                               |
| 27        | <i>Streptococcus pyogenes STAB902</i>           | 914               | 790                    | 0                   | 2                               |
| 28        | <i>Streptococcus pyogenes STAB901</i>           | 914               | 390                    | 11                  | 254                             |

**Table S4:** Distribution of core, accessory, unique and exclusively absent genes among all 28 *S. pyogenes* strains using OrthoMCL clustering tool.

| Genome id | Organism name                                   | No. of core genes | No. of accessory genes | No. of unique genes | No. of exclusively absent genes |
|-----------|-------------------------------------------------|-------------------|------------------------|---------------------|---------------------------------|
| 1         | <i>Streptococcus pyogenes 1E1</i>               | 854               | 626                    | 9                   | 2                               |
| 2         | <i>Streptococcus pyogenes strain 7F7</i>        | 854               | 538                    | 5                   | 1                               |
| 3         | <i>Streptococcus pyogenes strain AP1</i>        | 854               | 726                    | 22                  | 3                               |
| 4         | <i>Streptococcus pyogenes strain ATCC 19615</i> | 854               | 672                    | 17                  | 2                               |
| 5         | <i>Streptococcus pyogenes strain HKU360</i>     | 854               | 722                    | 13                  | 2                               |
| 6         | <i>Streptococcus pyogenes M23ND</i>             | 854               | 637                    | 36                  | 3                               |
| 7         | <i>Streptococcus pyogenes M1 GAS</i>            | 854               | 649                    | 5                   | 8                               |
| 8         | <i>Streptococcus pyogenes MGAS8232</i>          | 854               | 698                    | 22                  | 2                               |
| 9         | <i>Streptococcus pyogenes MGAS315</i>           | 854               | 746                    | 10                  | 0                               |
| 10        | <i>Streptococcus pyogenes SSI 1</i>             | 854               | 730                    | 14                  | 3                               |
| 11        | <i>Streptococcus pyogenes MGAS10394</i>         | 854               | 697                    | 59                  | 5                               |
| 12        | <i>Streptococcus pyogenes MGAS6180</i>          | 854               | 766                    | 30                  | 0                               |
| 13        | <i>Streptococcus pyogenes MGAS5005</i>          | 854               | 728                    | 24                  | 0                               |
| 14        | <i>Streptococcus pyogenes MGAS9429</i>          | 854               | 715                    | 23                  | 0                               |
| 15        | <i>Streptococcus pyogenes MGAS10270</i>         | 854               | 787                    | 47                  | 0                               |
| 16        | <i>Streptococcus pyogenes MGAS2096</i>          | 854               | 664                    | 75                  | 4                               |
| 17        | <i>Streptococcus pyogenes MGAS10750</i>         | 854               | 762                    | 62                  | 1                               |
| 18        | <i>Streptococcus pyogenes str. Manfredo</i>     | 854               | 662                    | 12                  | 8                               |
| 19        | <i>Streptococcus pyogenes NZ131</i>             | 854               | 639                    | 24                  | 4                               |
| 20        | <i>Streptococcus pyogenes MGAS15252</i>         | 854               | 608                    | 11                  | 2                               |
| 21        | <i>Streptococcus pyogenes MGAS1882</i>          | 854               | 641                    | 16                  | 1                               |
| 22        | <i>Streptococcus pyogenes Alab49</i>            | 854               | 643                    | 15                  | 4                               |
| 23        | <i>Streptococcus pyogenes A20</i>               | 854               | 696                    | 23                  | 0                               |
| 24        | <i>Streptococcus pyogenes M1 476</i>            | 854               | 550                    | 4                   | 53                              |
| 25        | <i>Streptococcus pyogenes HSC5</i>              | 854               | 631                    | 13                  | 14                              |
| 26        | <i>Streptococcus pyogenes HKU QMH11M0907901</i> | 854               | 716                    | 23                  | 0                               |
| 27        | <i>Streptococcus pyogenes STAB902</i>           | 854               | 725                    | 3                   | 2                               |
| 28        | <i>Streptococcus pyogenes STAB901</i>           | 854               | 328                    | 17                  | 223                             |

**Table S5:** Performance of BPGA on different datasets.

| No. of Genomes     | Total no. of proteins | Number of protein clusters | Time cost         | Maximum RAM used <sup>#</sup> (Mb) |
|--------------------|-----------------------|----------------------------|-------------------|------------------------------------|
| 24 <sup>\$</sup>   | 109,478               | 9,431                      | 3m50s             | 450                                |
| 28                 | 49,891                | 2,790                      | 2m30s             | 310                                |
| 200                | 332,718               | 156,328                    | 17m <sup>@</sup>  | 1100                               |
| 500                | 979,238               | 409,451                    | 122m <sup>@</sup> | 2000                               |
| 1000               | 1,769,242             | 680,832                    | 420m <sup>@</sup> | 3000                               |
| 1000 <sup>\$</sup> | 4,405,532             | 22,496                     | 111m <sup>@</sup> | 3400                               |

<sup>\$</sup>Strains of *Salmonella enterica* species, <sup>@</sup> Time excluding KEGG/COG function analysis, <sup>#</sup>Intel CORE i5 processor with 4 Gb RAM installed. USEARCH is used in all the cases as default clustering tool.
